# Supplementary material for: Solution based rapid synthesis of AgCuO2 at room temperature
Source: Royal Society of Chemistry journal article supplement (doi:10.1039/c4ra11853g), 2014-01-01
Supplement: c4ra11853g1.pdf [file c4ra11853g1.pdf]

## Solution based Rapid Synthesis of $\text{AgCuO}_2$ at Room

### Temperature

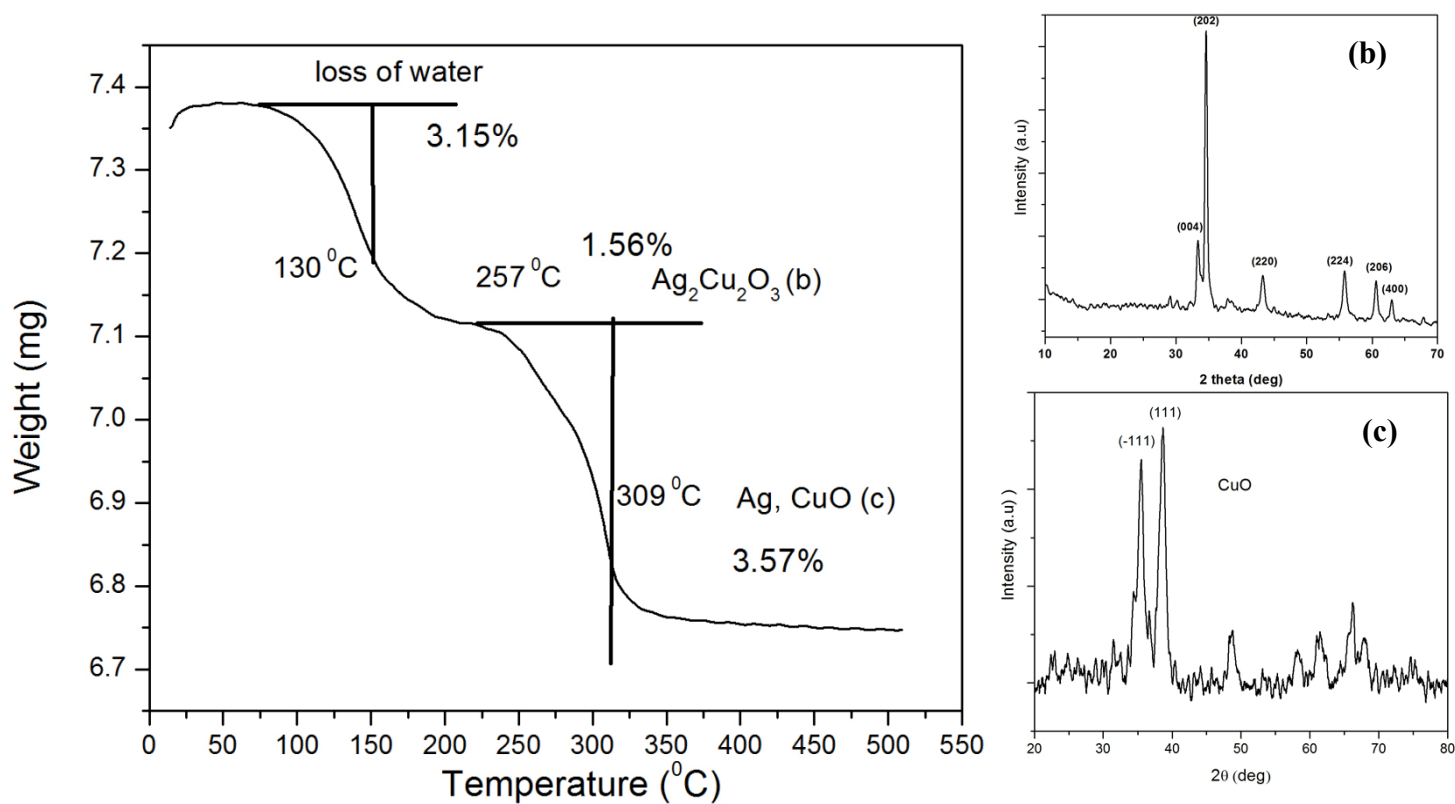

Figure S1. A thermogram of  $\text{AgCuO}_2$  harvested at fifth minute. The intermediate forming at 257  $^{\circ}\text{C}$  has been identified to be  $\text{Ag}_2\text{Cu}_2\text{O}_3$  (b) by X-ray powder diffraction. The final residue consists of Ag and CuO confirmed by XRD (c).

Theoretically, AgCuO<sub>2</sub> is predicted to be a low band gap material (~ 1.5 eV).<sup>12</sup> This is attributed to the overlap between Cu 3d and O 2p orbitals.<sup>29</sup> Our experimental value may have contributions from the particle size effect as well as excess oxygen.

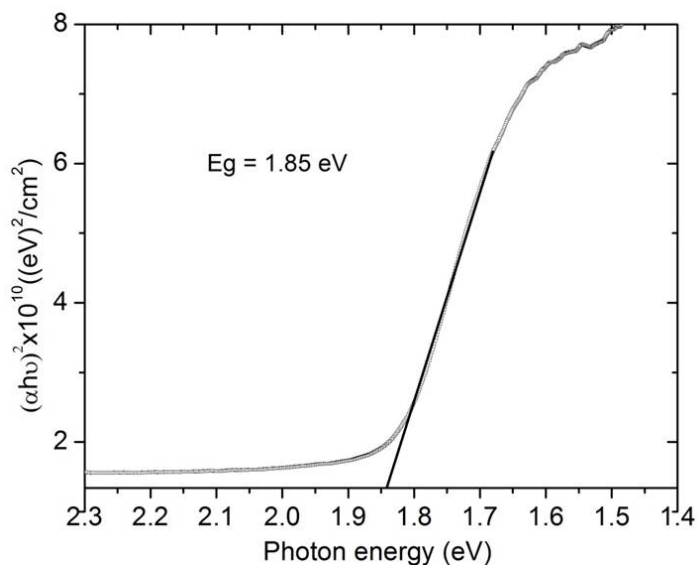

Fig. S2 .Squared absorption coefficient of AgCuO<sub>2</sub> versus photon energy.
